# Supplementary material for: Optimization of the Green Chemistry-like Extraction of Phenolic Compounds from Grape (Vitis labrusca L.) and Blackberry (Rubus fruticosus L.) Seeds with Concomitant Biological and Antioxidant Activity Assessments
Source: MDPI journal article supplement (doi:10.3390/plants12142618), 2023-07-11
Supplement: s1 [file s1]

## Supplementary Materials

**Table S1.** Mass spectrometry parameters for the analysis of each phenolic compound.

|                                   |                                                                                                                  |
|-----------------------------------|------------------------------------------------------------------------------------------------------------------|
| <b>Curtain Gas (CUR)</b>          | 25 V                                                                                                             |
| <b>Collision Gas (CAD)</b>        | High                                                                                                             |
| <b>IonSpray voltage (IS)</b>      | Negative mode -4500 and positive mood 5500                                                                       |
| <b>Temperature (TEM)</b>          | 400 °C                                                                                                           |
| <b>Ion Source Gas 1 (GS1)</b>     | 55 V                                                                                                             |
| <b>Ion Source Gas 2 (GS2)</b>     | 55 V                                                                                                             |
| <b>Column furnace temperature</b> | 40 °C                                                                                                            |
| <b>Injection volume</b>           | 5 uL                                                                                                             |
| <b>Flow</b>                       | 0.3 mL/min                                                                                                       |
| <b>0 min</b>                      | 98% A                                                                                                            |
| <b>0 to 3 min</b>                 | 80 % A                                                                                                           |
| <b>3 to 10 min</b>                | 10 % A                                                                                                           |
| <b>10 to 11 min</b>               | 10 % A                                                                                                           |
| <b>11 to 13 min</b>               | 98 % A                                                                                                           |
| <b>Break-even time</b>            | 3 min                                                                                                            |
| <b>Mobile phase A</b>             | Water 0.1% formic acid                                                                                           |
| <b>Mobile phase B</b>             | Acetonitrile 0.1% formic acid                                                                                    |
| <b>Column</b>                     | Zorbax Eclipse Plus C <sub>18</sub> column (3.5 µm, 3.0 x 100 mm), Agilent Technologies, Inc. (Saint Clara, USA) |
| <b>LoQ</b>                        | ranged from 0.20 to 12.8 µg/L                                                                                    |
| <b>Range of work</b>              | 25 to 1000 ug/L                                                                                                  |
| <b>HPLC</b>                       | 1290 Infinity HPLC system from Agilent Technologies Deutschland GmbH (Waldbronn, Germany)                        |
| <b>Mass</b>                       | Qtrap 5500 hybrid triple quadrupole-linear ion trap mass spectrometer from AB Sciex LLC (Framingham, USA)        |
| <b>Reference</b>                  | Seraglio, 2016                                                                                                   |
| <b>Ultrapure water</b>            | Minimum resistivity 18,3 MΩcm <sup>-1</sup>                                                                      |
| <b>Acetonitrile</b>               | UV/HPLC. scientific exodus Batch: 2108034375                                                                     |
| <b>Formic acid</b>                | HoneyWell Lote #SZBG2510H                                                                                        |

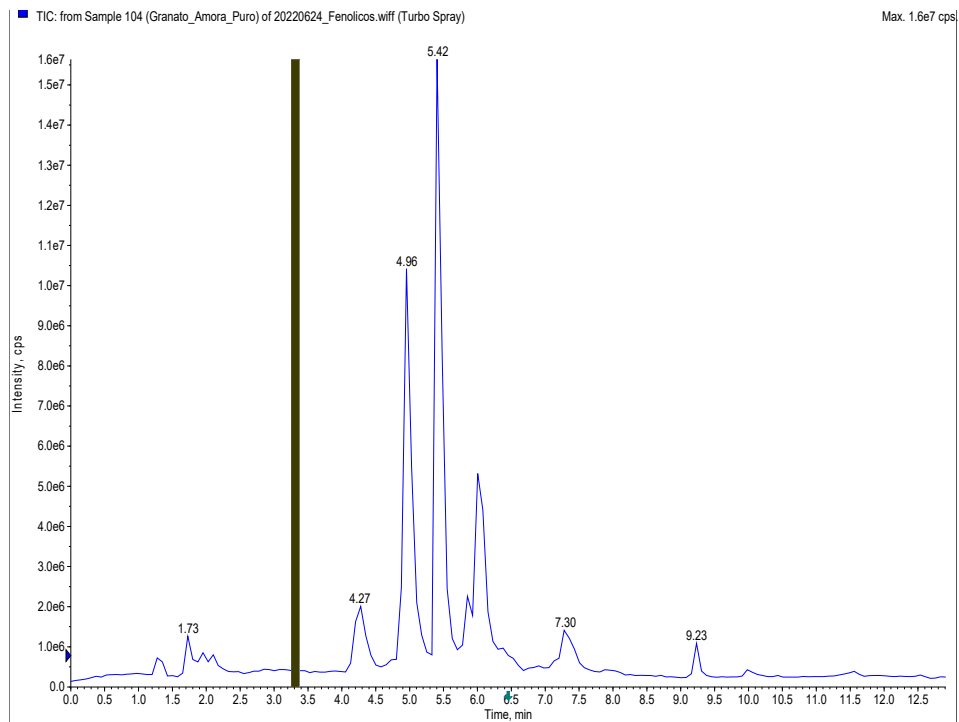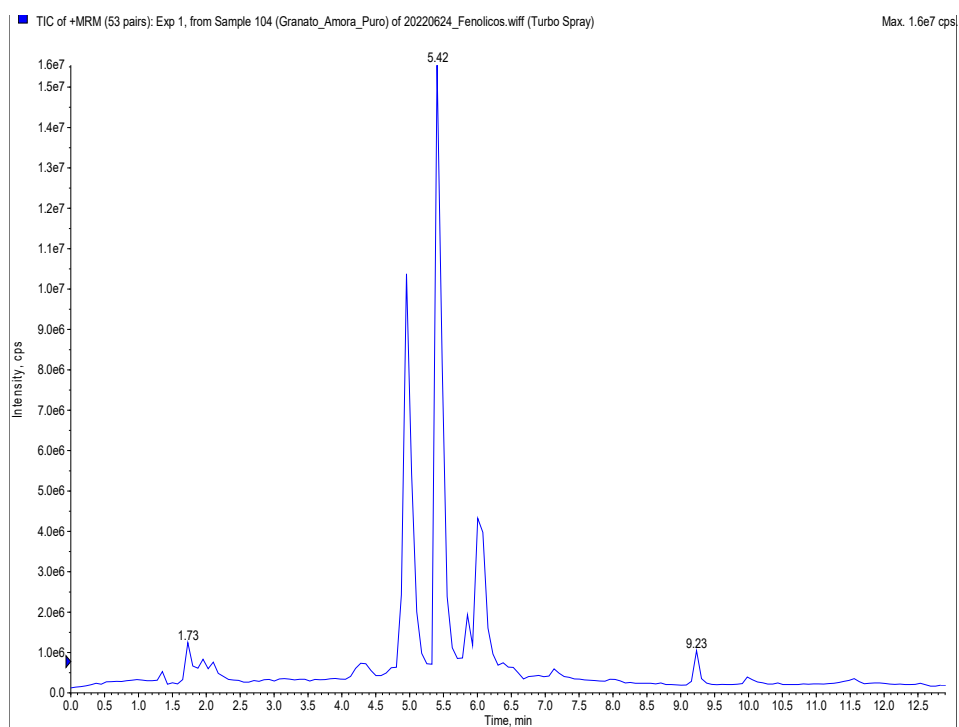

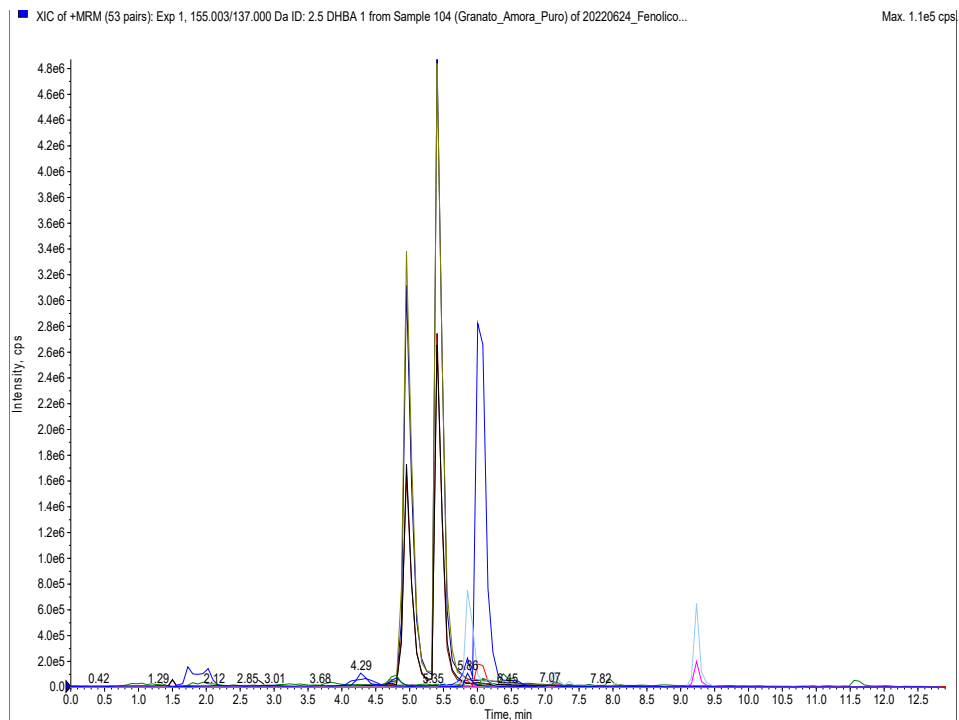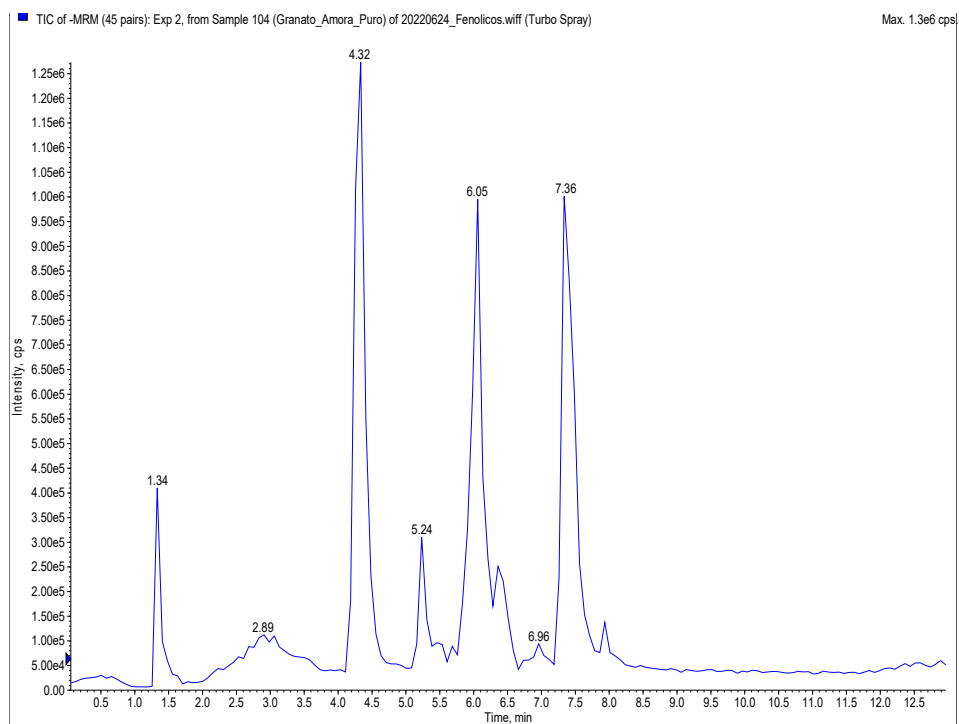

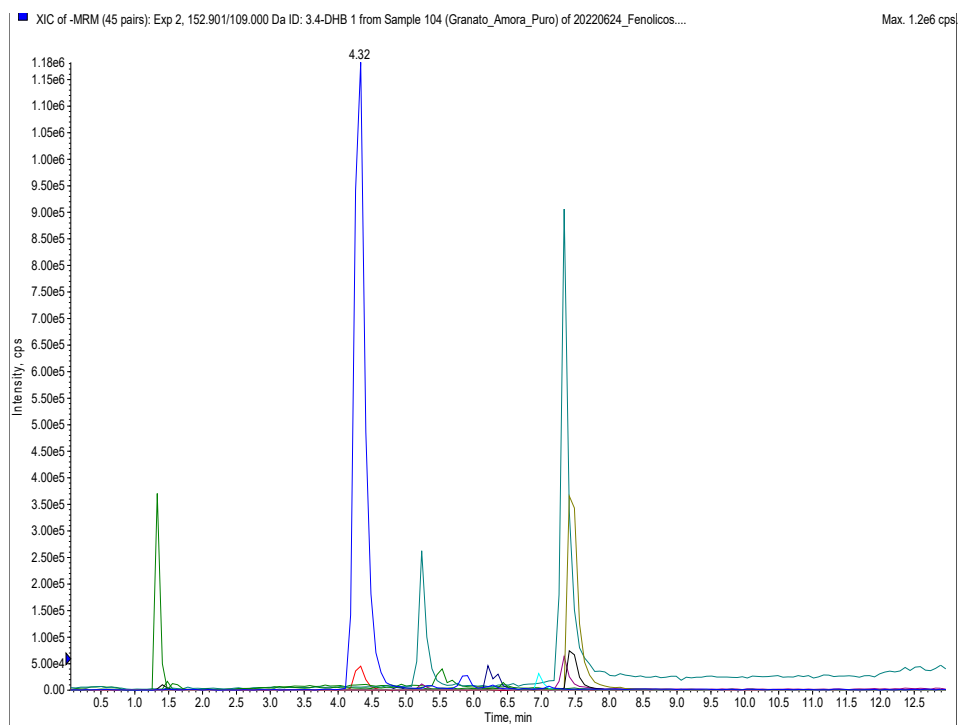

**Figure S1.** Blackberry chromatograms.

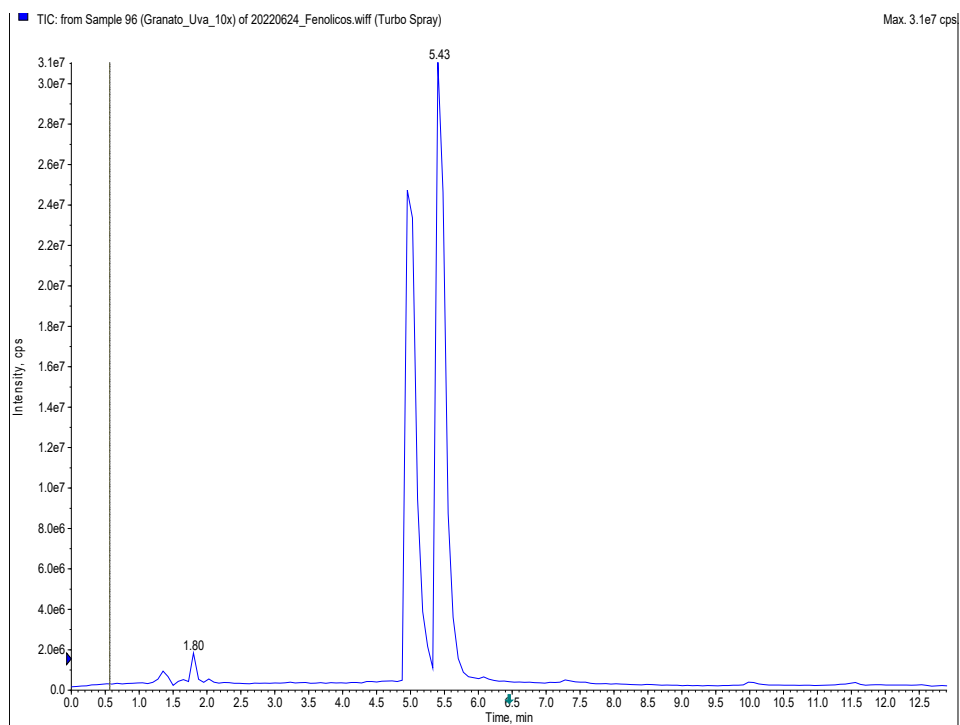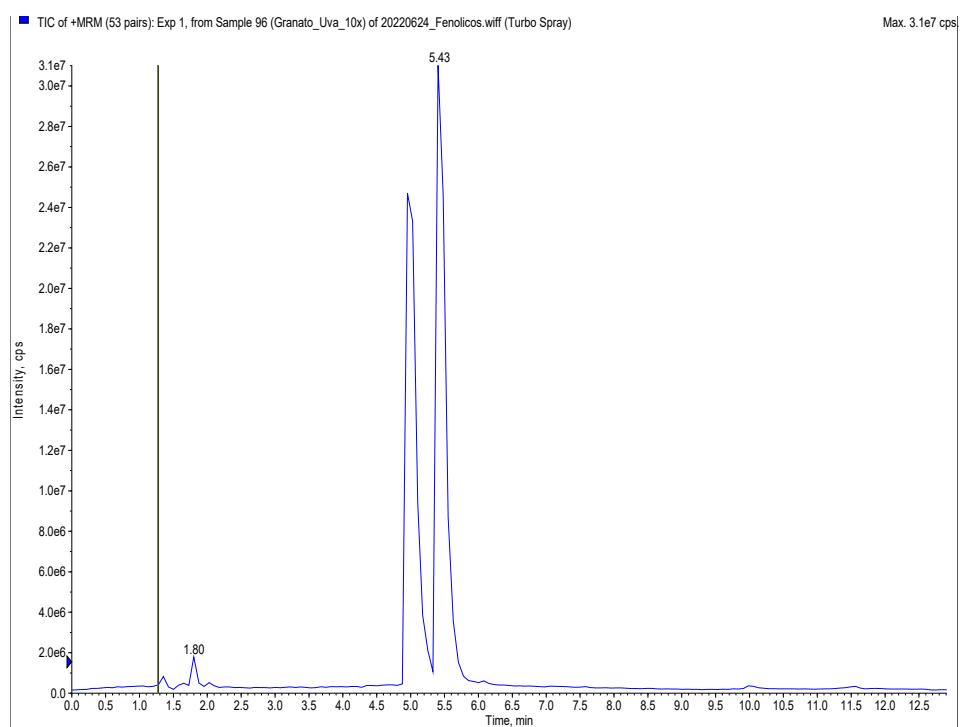

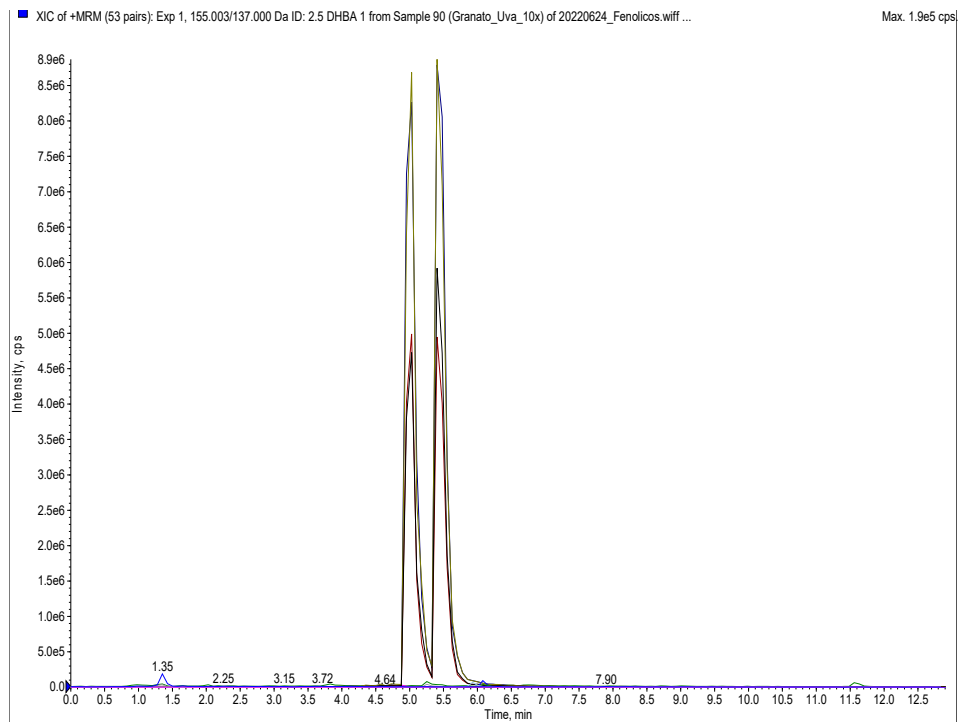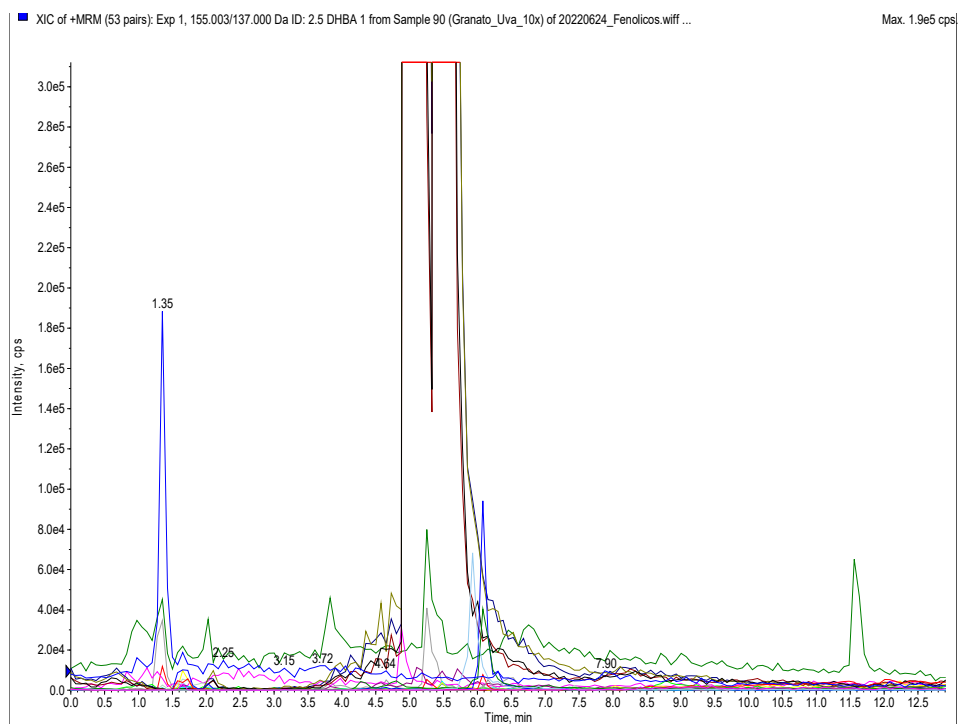

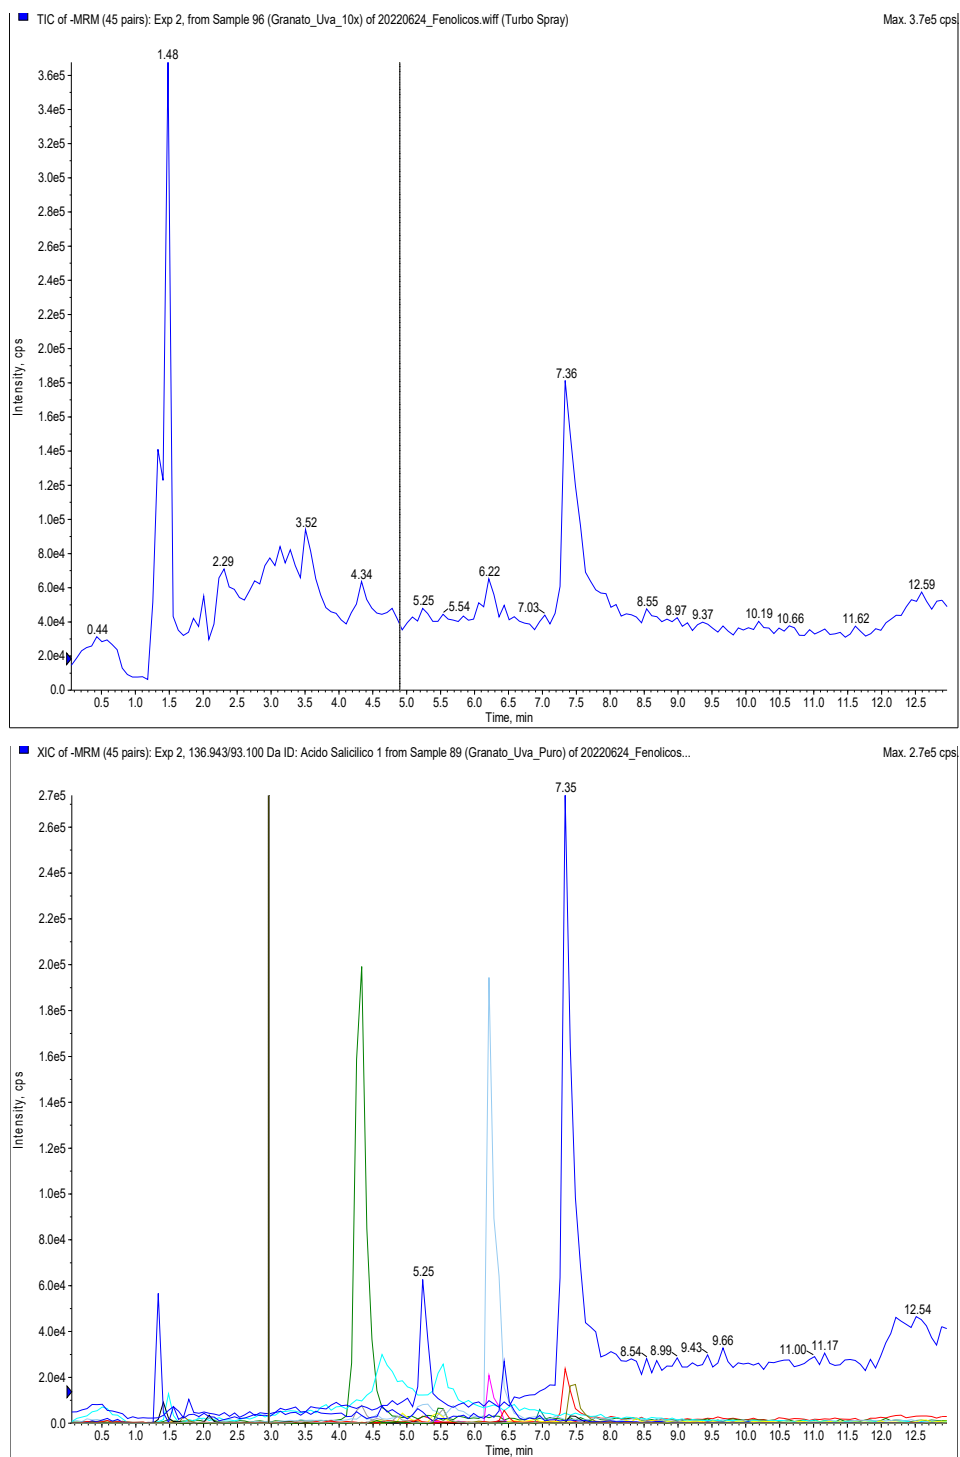

**Figure S2.** Grape chromatograms.
